# Supplementary material for: Barley – a yet un-tapped feedstock for improved vegetable protein-based wood adhesives
Source: Royal Society of Chemistry journal article supplement (doi:10.1039/d3ta00619k), 2023-01-01
Supplement: d3ta00619k1.pdf [file d3ta00619k1.pdf]

**Barley – a yet un-tapped feedstock for improved vegetable protein-based wood adhesives**

Guodong Zeng<sup>a</sup>, Feng Zhu<sup>a</sup>, John Tosin Aladejana<sup>a</sup>, Ying Zhou<sup>a</sup>, Kuang Li<sup>a</sup>, Jing Luo<sup>a</sup>, Xiaona Li<sup>a</sup>, Youming Dong<sup>a</sup>, Kaili Wang<sup>a</sup>, Jianzhang Li<sup>a, b \*</sup>

<sup>a</sup> Co-Innovation Center of Efficient Processing and Utilization of Forest Resources, College of Materials Science and Engineering, Nanjing Forestry University, Longpan Road 159, Xuanwu District, Nanjing 210037, China

<sup>b</sup> MOE Key Laboratory of Wooden Material Science and Application, Beijing Forestry University, Qinghua East Road 35, Haidian District, Beijing 100083, China

\* Corresponding author.

E-mail address: lijzh@bjfu.edu.cn (J. Li)

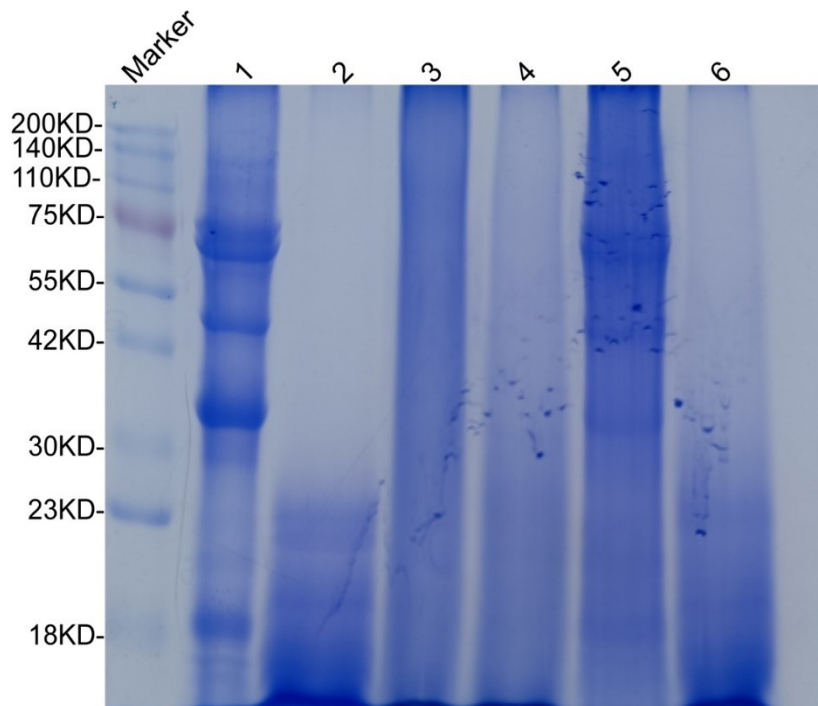

**Fig. S1.** The SDS-PAGE images of SP, SP-PA, BGP, BGP-PA, SP/BGP, and SP/BGP-PA adhesives.

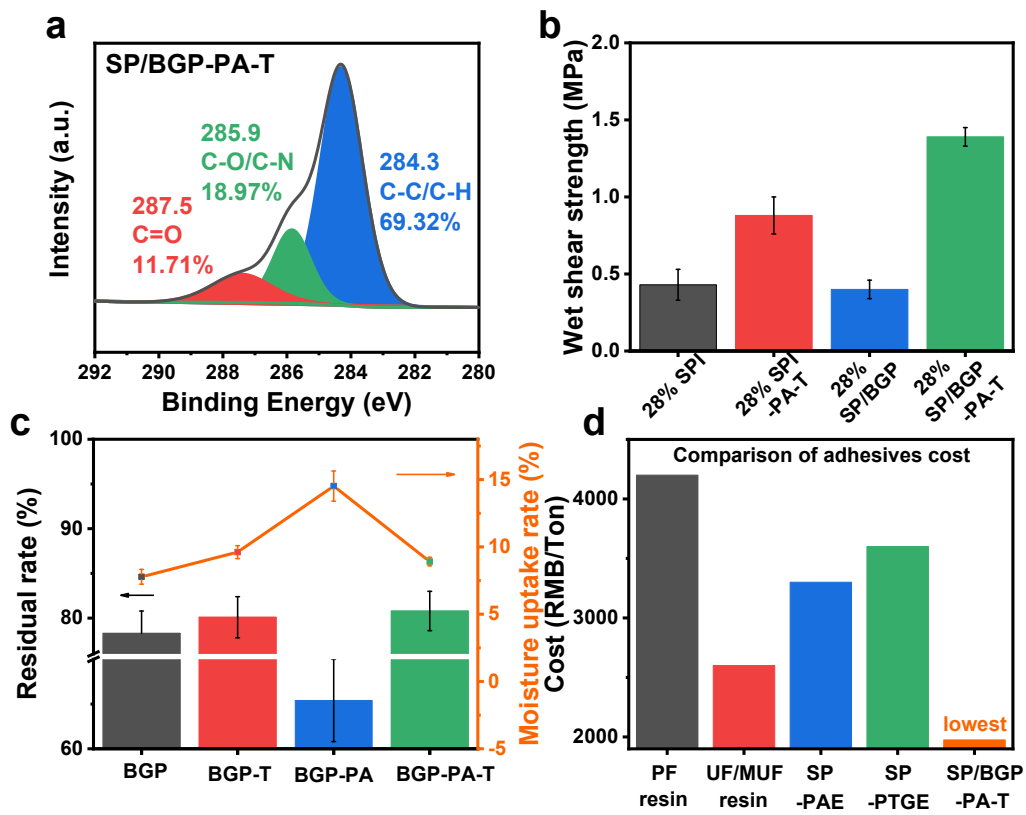

**Fig. S2.** (a) C1s spectrum of SP/BGP-PA adhesive, (b) the wet shear strength of 28%

SP, 28% SPI-PA-T, 28% SP/BGP, and 28% SP/BGP-PA-T adhesives, (c) the moisture absorption and residual rate of BGP based adhesives, (d) comparison of the cost of different adhesives.

**Table S1.** The cost calculation of SP/BGP-PA-T adhesive (RMB per ton).

| <b>Raw materials</b>     | SPI   | Water | TGA   | BG    | PA    | SP/BGP-PA-T    |
|--------------------------|-------|-------|-------|-------|-------|----------------|
| Unit Price (RMB per ton) | 12000 | 4.16  | 9540  | 1300  | 33000 | -              |
| Consumption (Kg)         | 70    | 860   | 30    | 625   | 1     | -              |
| Cost (RMB)               | 840   | 3.58  | 286.2 | 812.5 | 33    | <b>1975.28</b> |

**Table S2.** The cost calculation of SP/BGP-SDS-T adhesive (RMB per ton).

| <b>Raw materials</b>     | SPI   | Water | TGA   | BG    | SDS  | SP/BGP-SDS-T   |
|--------------------------|-------|-------|-------|-------|------|----------------|
| Unit Price (RMB per ton) | 12000 | 4.16  | 9540  | 1300  | 6000 | -              |
| Consumption (Kg)         | 70    | 860   | 30    | 625   | 10   | -              |
| Cost (RMB)               | 840   | 3.58  | 286.2 | 812.5 | 60   | <b>2002.28</b> |

**Table S3.** The cost calculation of SP/BGP-pH11-T adhesive (RMB per ton).

| <b>Raw materials</b>     | SPI   | Water | TGA  | BG   | NaOH | SP/BGP-pH11-T |
|--------------------------|-------|-------|------|------|------|---------------|
| Unit Price (RMB per ton) | 12000 | 4.16  | 9540 | 1300 | 5400 | -             |
| Consumption (Kg)         | 70    | 860   | 30   | 625  | 10   | -             |

|            |     |      |       |       |    |                |
|------------|-----|------|-------|-------|----|----------------|
| Cost (RMB) | 840 | 3.58 | 286.2 | 812.5 | 54 | <b>1996.28</b> |
|------------|-----|------|-------|-------|----|----------------|

---

**Table S4.** The price of different plywood adhesives.

| Formulation of adhesives for the wood industry      | Price per ton (RMB) |
|-----------------------------------------------------|---------------------|
| Phenol formaldehyde (PF) resin adhesive             | <b>4200</b>         |
| Urea-formaldehyde (UF) resin adhesive               | <b>2400</b>         |
| 14% SPI + 28% PAE (12.5% solids content) +58% water | <b>3300</b>         |
| 14% SPI + 4% PTGE + 82% water                       | <b>3600</b>         |
| SP/BGP-PA-T                                         | <b>1975.28</b>      |

---

**Table S5.** The comprehensive performance (Wet shear strength, Residual rate, Chemical fossil product addition, Viscosity, and Cost) of SP/BGP-PA-T adhesive as compared to the previously reported SPI-based and SM-based adhesives.

| Soy-based adhesive (SPI/SM)         | Wet shear strength (MPa) | Residual rate (%) | Chemical fossil product addition | Viscosity (Pa·s) | Cost (RMB/Ton) | References |
|-------------------------------------|--------------------------|-------------------|----------------------------------|------------------|----------------|------------|
| SP/BGP-PA-T                         | 1.55                     | 83.4%             | 0                                | 5.07             | 1975.28        |            |
| SPI/BP@mica12                       | 1.05                     | -                 | 1.44%                            | -                | 4300           | <b>1</b>   |
| SPI-DBA@HBPA-CPBA-Ag                | 1.28                     | -                 | 2.8%                             | 91.41            | -              | <b>2</b>   |
| SPI/TGA/WPF-PDA/Cu(OH) <sub>2</sub> | 1.22                     | 72.8%             | 1.5%                             | -                | -              | <b>3</b>   |
| SM-T-CSSH                           | 1.49                     | 79.2%             | 2.45%                            | 61.96            | -              | <b>4</b>   |
| SM@BDAB-HDE                         | 1.25                     | 80.0%             | 8.8%                             | -                | -              | <b>5</b>   |
| SM-DACS-HNTs@N                      | 1.53                     | 79.2%             | 0.7%                             | -                | 2673           | <b>6</b>   |
| SM/TTE/CDs/BT@PDA@PANI              | 1.16                     | 84%               | 4%                               | -                | 2532           | <b>7</b>   |
| SM-CA/TA/FC-HNTs@SH                 | 1.46                     | 77.1%             | 0.8%                             | 33.0             | 2200           | <b>8</b>   |
| SM-PM                               | 1.02                     | 74.55%            | 0                                | 14.96            | -              | <b>9</b>   |
| SP-HBPE-SB                          | 0.9                      | 70.6%             | 3.85%                            | -                | 2020           | <b>10</b>  |
| TSM/SEP/KH-560                      | 1.18                     | 76.8%             | 1%                               | 73.04            | -              | <b>11</b>  |
| SPI/EHL-ESO-7                       | 1.07                     | -                 | 6.9%                             | -                | -              | <b>12</b>  |

## References

1. Y. Zhou, G. Zeng, F. Zhang, K. Li, X. Li, J. Luo, J. Li and J. Li, *Chemical Engineering Journal*, 2023, **460**, 141774.
2. Z. Liu, T. Liu, W. Gu, X. Zhang, J. Li, S. Q. Shi and Q. Gao, *Chemical Engineering Journal*, 2022, **449**, 137822.
3. Y. Xu, Y. Han, Y. Li, J. Li, J. Li and Q. Gao, *Chemical Engineering Journal*, 2022, **437**, 135437.
4. G. Zeng, Y. Zhou, Y. Liang, F. Zhang, J. Luo, J. Li and Z. Fang, *Chemical Engineering Journal*, 2022, **434**, 134632.
5. M. Bai, Y. Zhang, Y. Bian, Q. Gao, S. Q. Shi, J. Cao, Q. Zhang and J. Li, *Chemical Engineering Journal*, 2023, **452**, 139359.
6. G. Zeng, K. Li, Y. Zhou, T. Wang, Y. Dong, J. Luo, X. Zhan and J. Li, *International Journal of Biological Macromolecules*, 2023, **236**, 123931.
7. Y. Wei, S. Jiang, J. Li, J. Tosin Aladejana, T. Zhang, X. Li, Y. Dong and J. Li, *Chemical Engineering Journal*, 2023, **458**, 141512.
8. G. Zeng, Y. Zhou, T. Wang, K. Li, Y. Dong, J. Li, J. Li and Z. Fang, *Chemical Engineering Journal*, 2023, **453**, 139761.
9. X. Li, F. Zhang, J. Li, C. Xia and J. Li, *Polymer Testing*, 2022, **109**.
10. W. Gu, F. Li, X. Liu, Q. Gao, S. Gong, J. Li and S. Q. Shi, *Green Chemistry*, 2020, **22**, 1319-1328.
11. X. Li, J. Luo, Q. Gao and J. Li, *RSC Advances*, 2016, **6**, 45158-45165.
12. S. Chen, Y. Chen, Z. Wang, H. Chen and D. Fan, *RSC Adv*, 2021, **11**, 11724-11731.
